# Supplementary material for: Exploiting the flexibility of the pyrochlore composition for acid-resilient iridium oxide electrocatalysts in proton exchange membranes
Source: Royal Society of Chemistry journal article supplement (doi:10.1039/d1ta05457k), 2021-01-01
Supplement: d1ta05457k1.pdf [file d1ta05457k1.pdf]

## SUPPORTING INFORMATION

### Exploiting the Flexibility of the Pyrochlore Composition for Acid-Resilient Iridium Oxide Electrocatalysts in Proton Exchange Membranes

David L. Burnett, Enrico Petrucco, Reza J. Kashtiban, Stewart F. Parker, Jonathan D.B. Sharman and R.I. Walton

#### S1: Thermodiffraction results

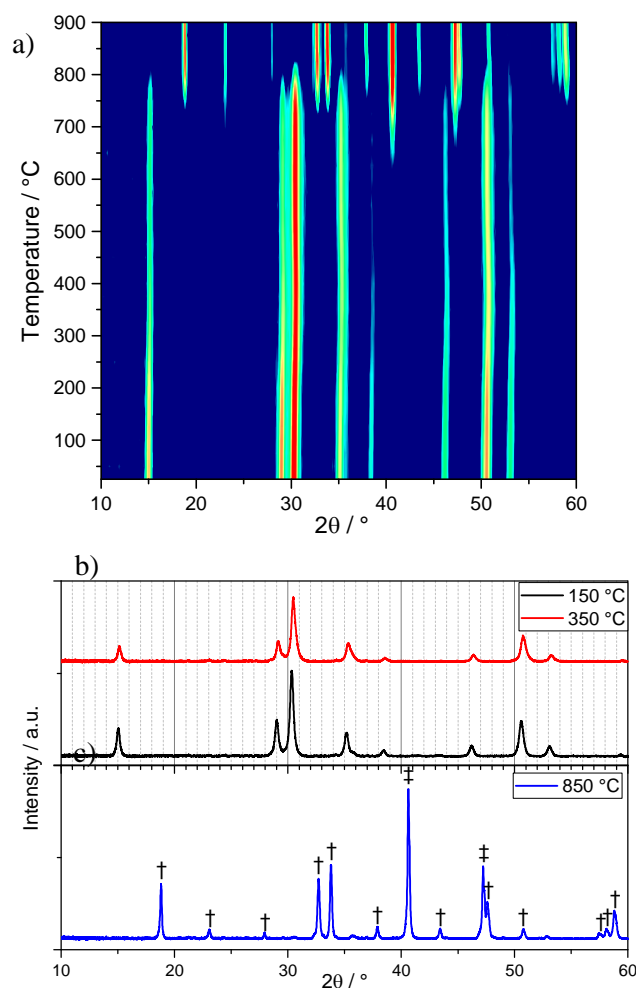

**Figure S1.1:** a) Thermodiffraction ( $\lambda = 1.5418 \text{ \AA}$ ) of calcium sodium iridium oxide synthesised from  $\text{CaO}_2$ . b) XRD patterns above and below the temperature at which crystal water is lost. c) XRD pattern after structure collapse, † denotes peaks arising from  $\text{Ca}_2\text{IrO}_4$  and ‡ denoting peaks arising from Ir metal.

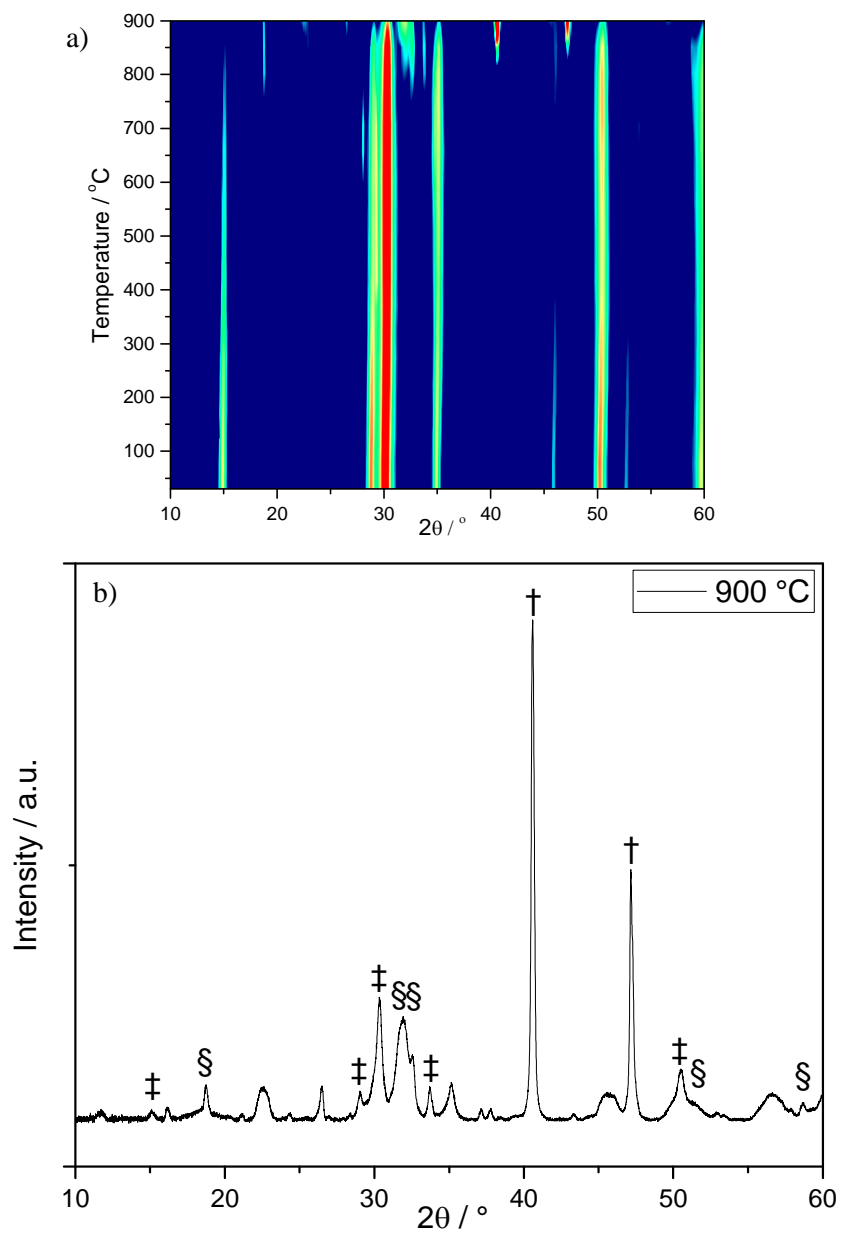

**Figure S2.2:** a) Thermodiffractometry ( $\lambda = 1.5418 \text{ \AA}$ ) of calcium iridium oxide. b) XRD pattern at 900 °C, † denoting peaks arising from Ir metal, ‡ denoting peaks arising from possible pyrochlore phase and § denoting peaks from possible  $\text{Ca}_2\text{IrO}_4$  phase

## S2: Characterisation of B-site substituted materials

### S2.1 Antimony substitution

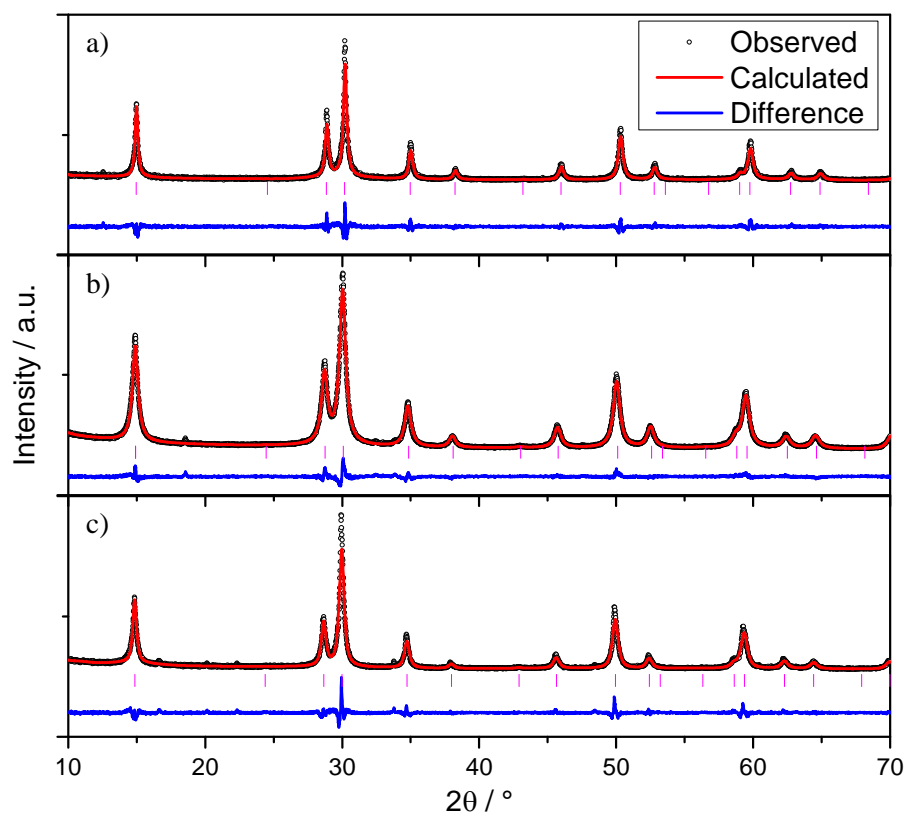

**Figure S2.1.1:** Rietveld refinements against powder XRD data ( $\lambda = 1.54056 \text{ \AA}$ ) for  $(\text{Ca,Na})_{2-x}(\text{Ir}_{1-y}\text{Sb}_y)_2\text{O}_6 \cdot \text{H}_2\text{O}$ , a)  $y = 0.25$ , b)  $y = 0.50$  and c)  $y = 1.00$ .

**Table S2.1.1:** Structural details of  $(\text{Ca,Na})_{2-x}(\text{Ir}_{1-y}\text{Sb}_y)_2\text{O}_6 \cdot \text{H}_2\text{O}$  pyrochlores obtained from Rietveld refinement against powder XRD data.

| Atom                                                                                                    | Site | $x$       | $y$   | $z$   | Occ       | $U_{\text{iso}} / \text{\AA}^2$ |
|---------------------------------------------------------------------------------------------------------|------|-----------|-------|-------|-----------|---------------------------------|
| <b>25% Sb Pyrochlore:</b> $a = 10.2561(2) \text{ \AA}$ / Crystallite Size = $17.8 \pm 3.4 \text{ nm}$   |      |           |       |       |           |                                 |
| Ca                                                                                                      | 16d  | 0.5       | 0.5   | 0.5   | 0.666(7)  | 0.0369(19)                      |
| Na                                                                                                      | 16d  | 0.5       | 0.5   | 0.5   | 0.322(12) | 0.0369(19)                      |
| Ir                                                                                                      | 16c  | 0         | 0     | 0     | 0.708(4)  | 0.0062(3)                       |
| Sb                                                                                                      | 16c  | 0         | 0     | 0     | 0.292(4)  | 0.0062(3)                       |
| O                                                                                                       | 48f  | 0.3391(8) | 0.125 | 0.125 | 1.000(14) | 0.021(3)                        |
| O'                                                                                                      | 8b   | 0.375     | 0.375 | 0.375 | 1.064(18) | 0.026(7)                        |
| <b>50% Sb Pyrochlore:</b> $a = 10.29167(11) \text{ \AA}$ / Crystallite Size = $13.2 \pm 1.4 \text{ nm}$ |      |           |       |       |           |                                 |
| Ca                                                                                                      | 16d  | 0.5       | 0.5   | 0.5   | 0.610(3)  | 0.0568(8)                       |
| Na                                                                                                      | 16d  | 0.5       | 0.5   | 0.5   | 0.356(5)  | 0.0568(8)                       |
| Ir                                                                                                      | 16c  | 0         | 0     | 0     | 0.467(2)  | 0.0149(2)                       |
| Sb                                                                                                      | 16c  | 0         | 0     | 0     | 0.533(2)  | 0.0149(2)                       |
| O                                                                                                       | 48f  | 0.3277(2) | 0.125 | 0.125 | 1.002(5)  | 0.0092(9)                       |
| O'                                                                                                      | 8b   | 0.375     | 0.375 | 0.375 | 1.001(7)  | 0.067(3)                        |
| <b>100% Sb Pyrochlore:</b> $a = 10.3214(2) \text{ \AA}$ / Crystallite Size = $16.5 \pm 2.1 \text{ nm}$  |      |           |       |       |           |                                 |
| Ca                                                                                                      | 16d  | 0.5       | 0.5   | 0.5   | 0.621(4)  | 0.0181(11)                      |
| Na                                                                                                      | 16d  | 0.5       | 0.5   | 0.5   | 0.336(7)  | 0.0181(11)                      |
| Sb                                                                                                      | 16c  | 0         | 0     | 0     | 1.000(1)  | 0.0111(2)                       |
| O                                                                                                       | 48f  | 0.3323(4) | 0.125 | 0.125 | 1.000(8)  | 0.0145(19)                      |
| O'                                                                                                      | 8b   | 0.375     | 0.375 | 0.375 | 1.010(9)  | 0.065(7)                        |

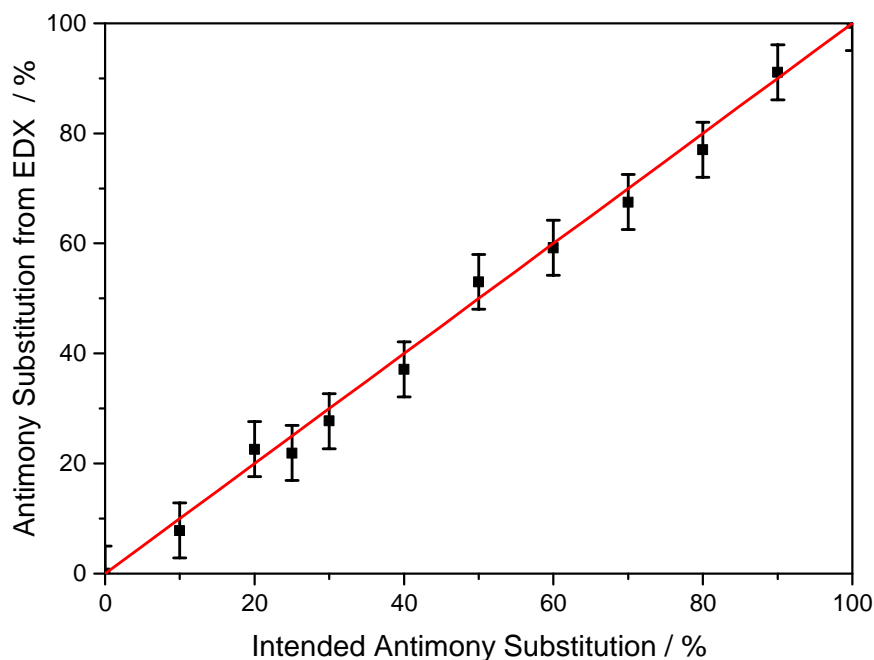

**Figure S2.1.2:** Measured antimony content from EDXA as a function of intended antimony substitution.

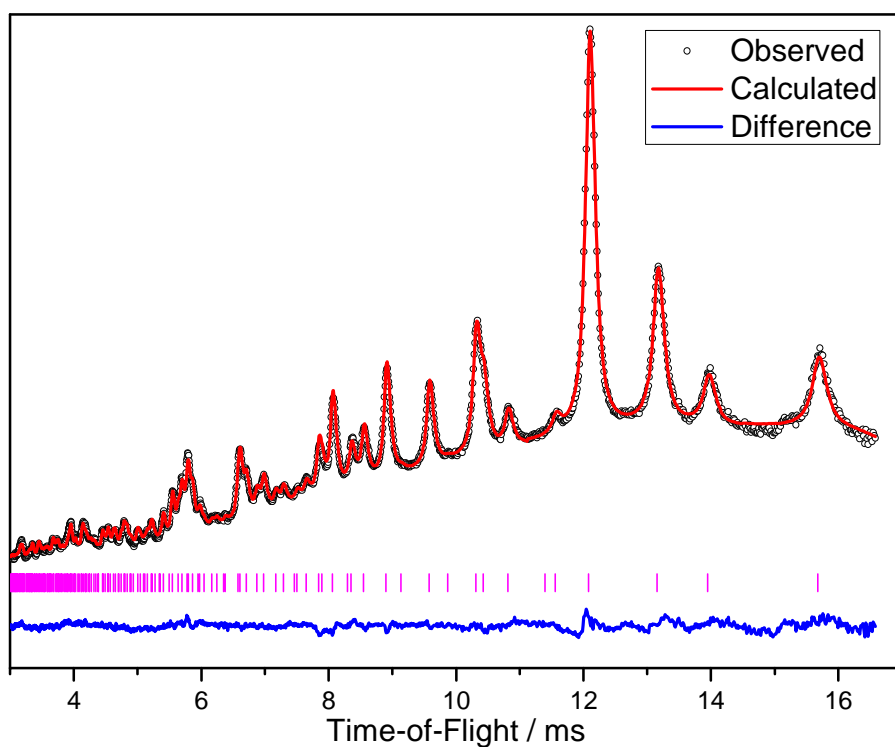

**Figure S2.1.3:** Rietveld refinement against time-of-flight neutron data from bank 5 of GEM for 50 % antimony substituted calcium sodium iridium oxide.

**Table 2.1.2:** Structural details of 50 % antimony substituted calcium sodium iridium oxide, obtained from Rietveld refinement of powder neutron diffraction data.

| Atom                                                                           | Site        | $x$         | $y$    | $z$    | Occ       | $U_{\text{iso}} / \text{\AA}^2$ |
|--------------------------------------------------------------------------------|-------------|-------------|--------|--------|-----------|---------------------------------|
| <b>50 % Sb Substituted Pyrochlore: <math>a = 10.2749(2) \text{ \AA}</math></b> |             |             |        |        |           |                                 |
| Ca                                                                             | 16 <i>d</i> | 0.5         | 0.5    | 0.5    | 0.589(7)  | 0.0212(7)                       |
| Na                                                                             | 16 <i>d</i> | 0.5         | 0.5    | 0.5    | 0.324(10) | 0.0212(7)                       |
| Ir                                                                             | 16 <i>c</i> | 0           | 0      | 0      | 0.489(5)  | 0.00899(16)                     |
| Sb                                                                             | 16 <i>c</i> | 0           | 0      | 0      | 0.511(5)  | 0.00899(16)                     |
| O                                                                              | 48 <i>f</i> | 0.32355(10) | 0.125  | 0.125  | 1.000(2)  | 0.0099(11)                      |
| O'                                                                             | 8 <i>b</i>  | 0.375       | 0.375  | 0.375  | 1.000(6)  | 0.0367(10)                      |
| H                                                                              | 32 <i>e</i> | 0.3289      | 0.3289 | 0.3289 | 0.334(12) | *                               |

\*  $U_{11} = 0.752(2)$ ,  $U_{22} = 0.303(2)$ ,  $U_{33} = 0.753(2)$ ,  $U_{12} = -0.253(3)$ ,  $U_{13} = -0.400(12)$ ,  $U_{23} = -0.253(3)$

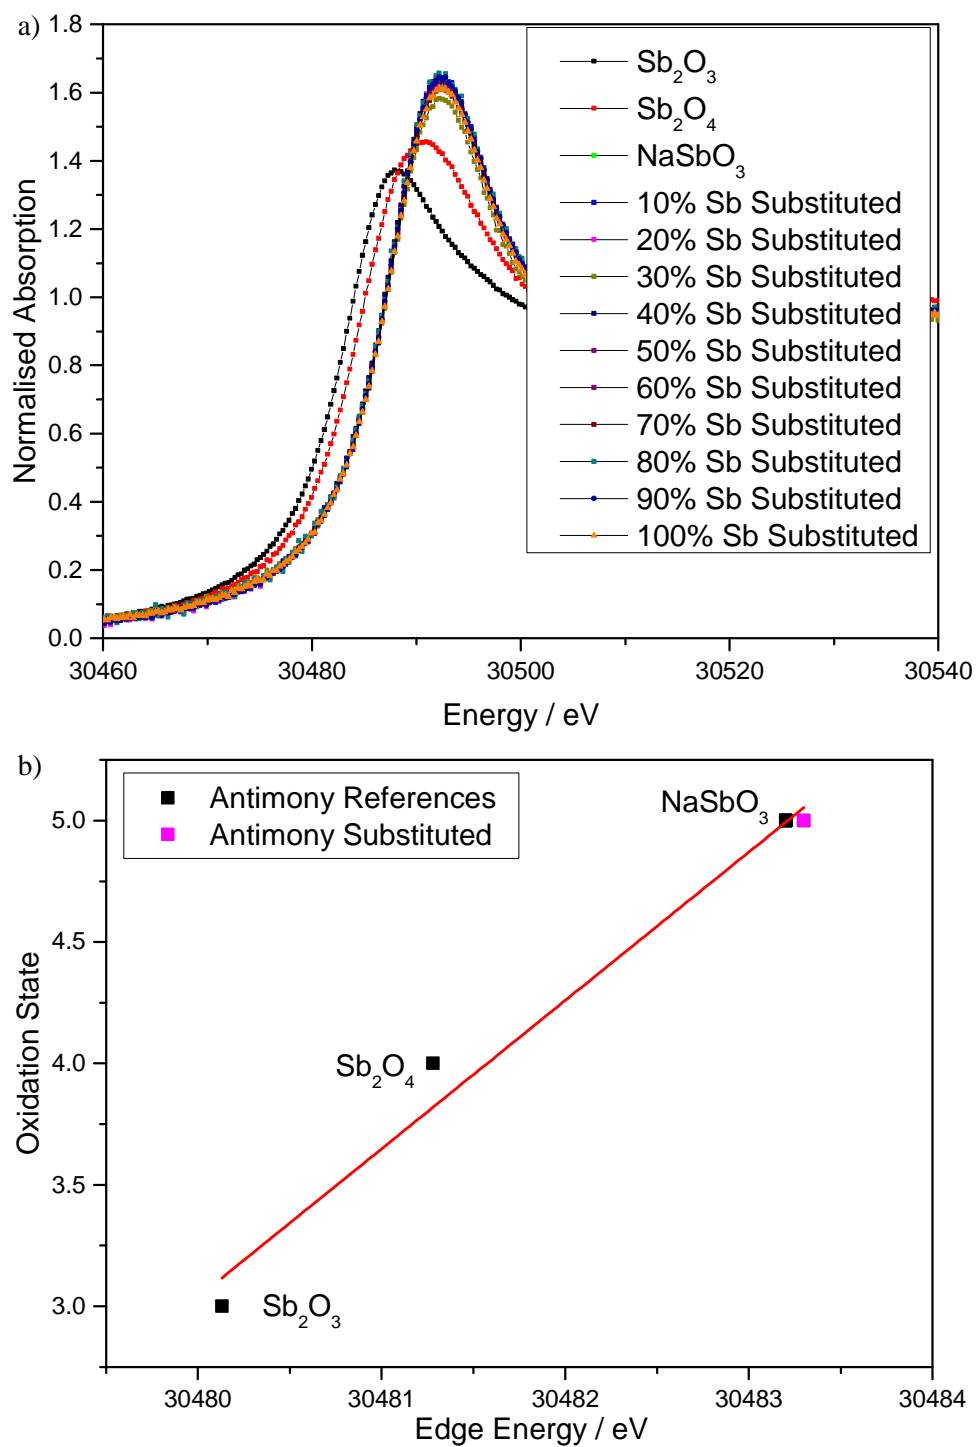

**Figure 2.1.4:** a) Sb K-edge XANES spectra of antimony calcium sodium iridium antimony oxide materials and reference materials for calibration. b) Edge position against antimony oxidation state.

## S2.2 Zirconium substitution

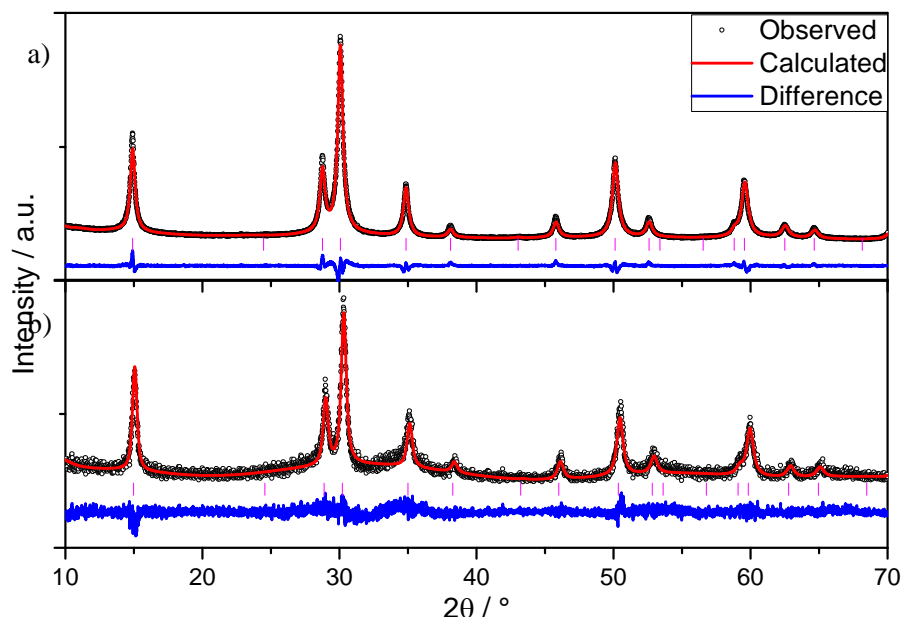

**Figure S2.2.1:** Rietveld refinements against powder XRD ( $\lambda = 1.54056 \text{ \AA}$ ), for  $(\text{Ca,Na})_{2-x}(\text{Ir}_{1-y}\text{Zr}_y)_2\text{O}_6 \cdot \text{H}_2\text{O}$ , a)  $y = 0.25$  and b)  $y = 0.50$ .

**Table S2.2.1:** Structural details of pyrochlores obtained from Rietveld refinement of powder XRD data of Zr substituted materials.

| Atom                                                                                                     | Site | $x$        | $y$   | $z$   | Occ       | $U_{\text{iso}} / \text{\AA}^2$ |
|----------------------------------------------------------------------------------------------------------|------|------------|-------|-------|-----------|---------------------------------|
| <b>25 % Zr Pyrochlore:</b> $a = 10.2471(5) \text{ \AA}$ / Crystallite Size = $15.4 \pm 1.8 \text{ nm}$   |      |            |       |       |           |                                 |
| Ca                                                                                                       | 16d  | 0.5        | 0.5   | 0.5   | 0.594(13) | 0.24(4)                         |
| Na                                                                                                       | 16d  | 0.5        | 0.5   | 0.5   | 0.24(2)   | 0.24(4)                         |
| Zr                                                                                                       | 16d  | 0.5        | 0.5   | 0.5   | 0.061(6)  | 0.24(4)                         |
| Ir                                                                                                       | 16c  | 0          | 0     | 0     | 0.795(3)  | 0.082(6)                        |
| Zr                                                                                                       | 16c  | 0          | 0     | 0     | 0.205(5)  | 0.082(6)                        |
| O                                                                                                        | 48f  | 0.3236(14) | 0.125 | 0.125 | 0.99(2)   | 0.16(7)                         |
| O'                                                                                                       | 8b   | 0.375      | 0.375 | 0.375 | 1.00(5)   | 0.40(18)                        |
| <b>50 % Zr Pyrochlore:</b> $a = 10.26542(11) \text{ \AA}$ / Crystallite Size = $14.4 \pm 1.5 \text{ nm}$ |      |            |       |       |           |                                 |
| Ca                                                                                                       | 16d  | 0.5        | 0.5   | 0.5   | 0.579(3)  | 0.0315(5)                       |
| Na                                                                                                       | 16d  | 0.5        | 0.5   | 0.5   | 0.300(5)  | 0.0315(5)                       |
| Zr                                                                                                       | 16d  | 0.5        | 0.5   | 0.5   | 0.120(1)  | 0.0315(5)                       |
| Ir                                                                                                       | 16c  | 0          | 0     | 0     | 0.560(1)  | 0.0226(2)                       |
| Zr                                                                                                       | 16c  | 0          | 0     | 0     | 0.440(1)  | 0.0226(2)                       |
| O                                                                                                        | 48f  | 0.3328(2)  | 0.125 | 0.125 | 1.001(5)  | 0.0286(14)                      |
| O'                                                                                                       | 8b   | 0.375      | 0.375 | 0.375 | 0.998(6)  | 0.076(5)                        |

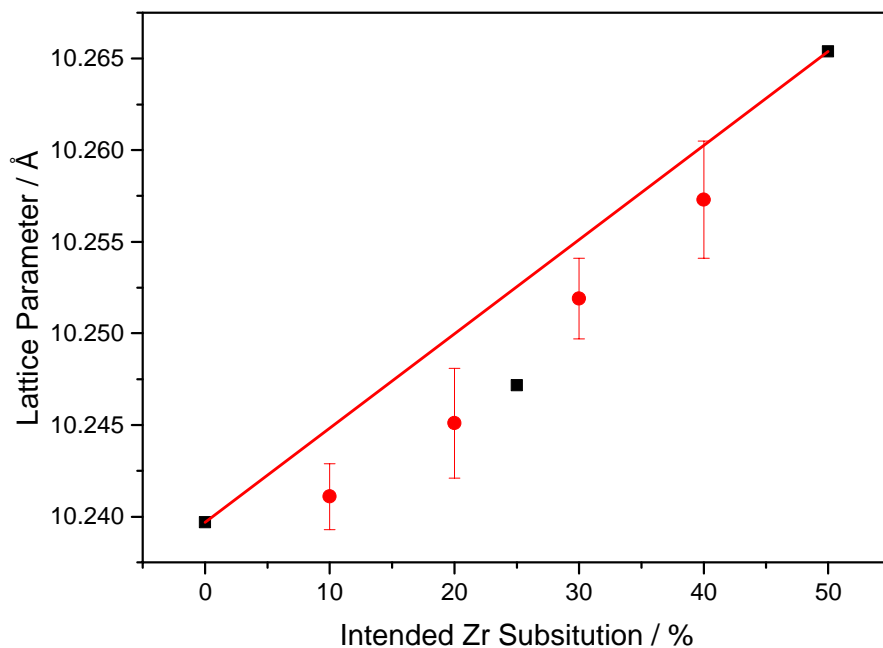

**Figure S2.2.2:** Refined lattice parameter as a function of intended zirconium substitution. Black points from Rietveld fits and red points from Le Bail fits. Red line is an extrapolation between the two extremes in composition.

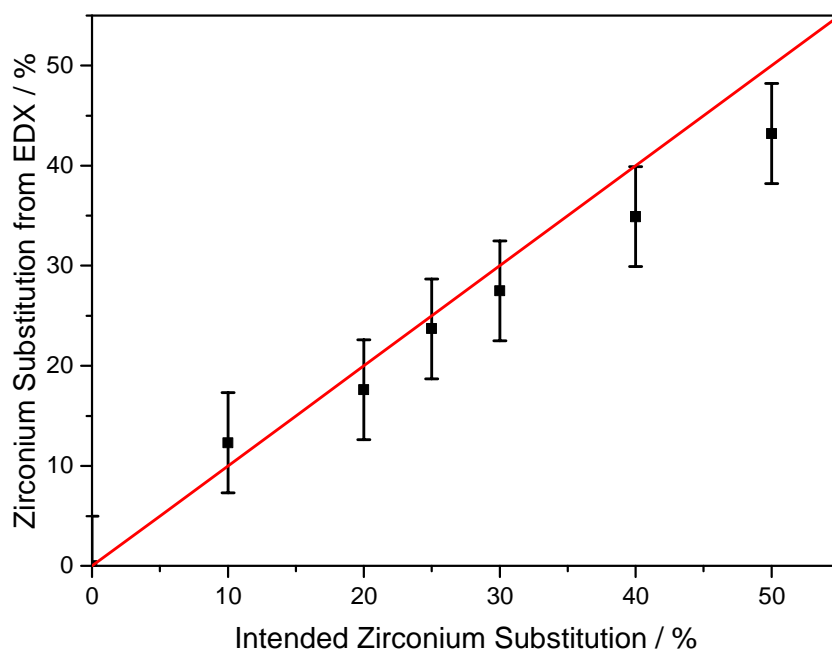

**Figure S2.2.3:** Measured zirconium content from EDX as a function of intended zirconium substitution.



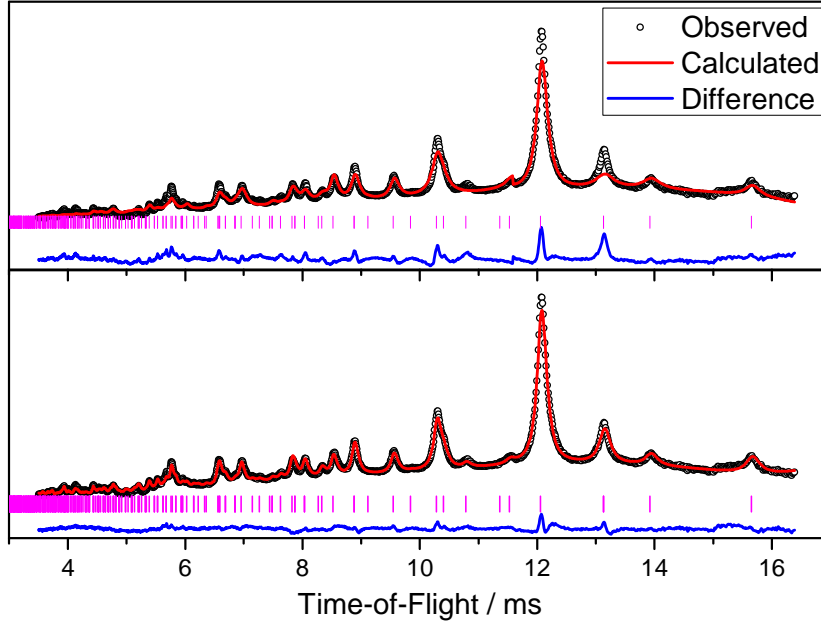

**Figure S2.2.4:** Rietveld refinements against time-of-flight neutron data from bank 5 of GEM for 50 % zirconium substituted calcium sodium iridium oxide. a) With all zirconium on 16c site. b) With a small fraction of zirconium on 16d site.

**Table S2.2.2:** Structural details of 50 % zirconium substituted calcium sodium iridium oxide pyrochlore obtained from Rietveld refinement of powder neutron diffraction data.

| Atom                                                                          | Site | $x$       | $y$    | $z$    | Occ       | $U_{\text{iso}} / \text{\AA}^2$ |
|-------------------------------------------------------------------------------|------|-----------|--------|--------|-----------|---------------------------------|
| <b>50 % Zr Substituted Pyrochlore: <math>a = 10.2318(3) \text{\AA}</math></b> |      |           |        |        |           |                                 |
| Ca                                                                            | 16d  | 0.5       | 0.5    | 0.5    | 0.568(11) | 0.0243(10)                      |
| Na                                                                            | 16d  | 0.5       | 0.5    | 0.5    | 0.315(15) | 0.0243(10)                      |
| Zr                                                                            | 16d  | 0.5       | 0.5    | 0.5    | 0.120(7)  | 0.0243(10)                      |
| Ir                                                                            | 16c  | 0         | 0      | 0      | 0.560(3)  | 0.0095(2)                       |
| Zr                                                                            | 16c  | 0         | 0      | 0      | 0.440(3)  | 0.0095(2)                       |
| O                                                                             | 48f  | 0.3303(2) | 0.125  | 0.125  | 1.000(3)  | 0.0152(2)                       |
| O'                                                                            | 8b   | 0.375     | 0.375  | 0.375  | 0.965(12) | 0.0233(14)                      |
| H                                                                             | 32e  | 0.3289    | 0.3289 | 0.3289 | 0.48(3)   | *                               |

\*  $U_{11} = 0.4342(16)$ ,  $U_{22} = 0.4342(16)$ ,  $U_{33} = 0.4342(16)$ ,  $U_{12} = -0.238(2)$ ,  $U_{13} = -0.238(2)$ ,  $U_{23} = -0.238(2)$

### S2.3 Ruthenium substitution

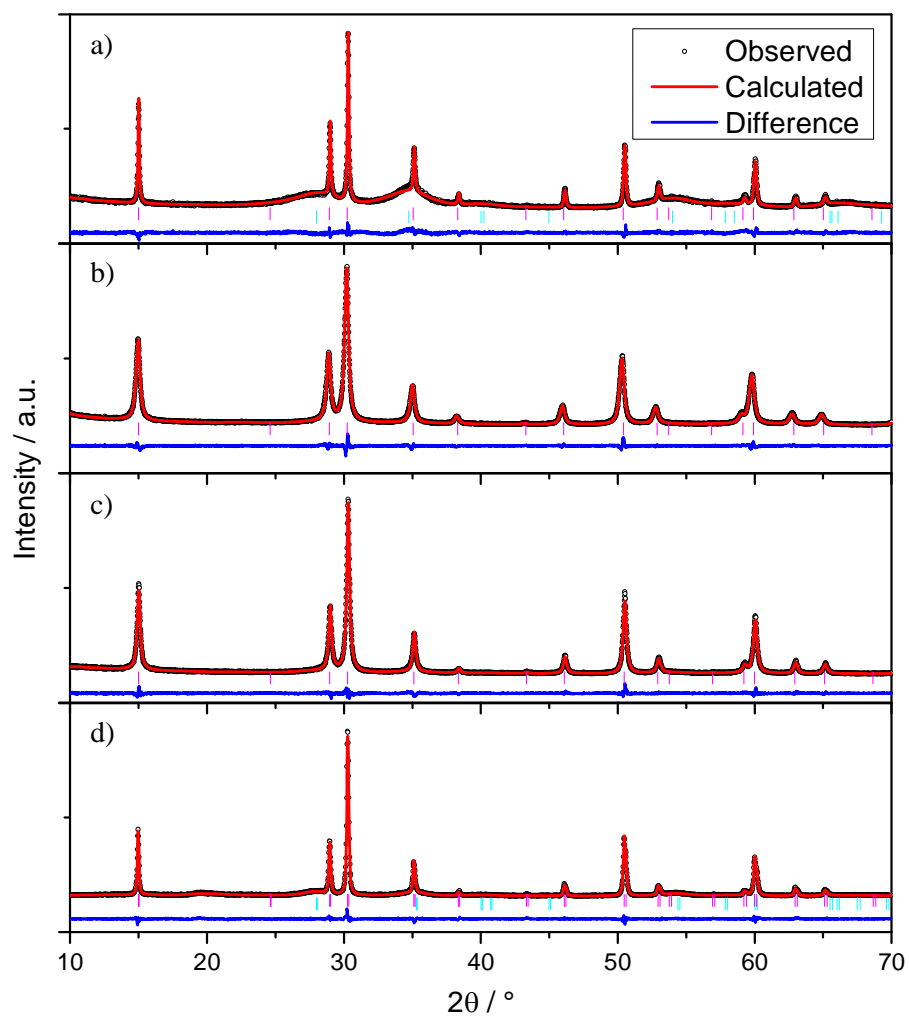

**Figure S2.3.1:** Rietveld refinements against powder XRD data ( $\lambda = 1.54056 \text{ \AA}$ ) for  $(\text{Ca,Na})_{2-x}(\text{Ir}_{1-y}\text{Ru}_y)_2\text{O}_6 \cdot \text{H}_2\text{O}$ , a)  $y = 0.25$ , b)  $y = 0.50$ , c)  $y = 0.75$  and d)  $y = 1.00$ .

**Table S2.3.1:** Structural details of pyrochlores obtained from Rietveld refinement of powder XRD data, of ruthenium substituted materials.

| Atom                                                                                                    | Site        | <i>x</i>  | <i>y</i> | <i>z</i> | Occ       | $U_{\text{iso}} / \text{\AA}^2$ |
|---------------------------------------------------------------------------------------------------------|-------------|-----------|----------|----------|-----------|---------------------------------|
| <b>25 % Ru Pyrochlore:</b> $a = 10.23528(8) \text{\AA}$ / Crystallite Size = $35.2 \pm 10.0 \text{ nm}$ |             |           |          |          |           |                                 |
| Ca                                                                                                      | 16 <i>d</i> | 0.5       | 0.5      | 0.5      | 0.637(5)  | 0.020(2)                        |
| Na                                                                                                      | 16 <i>d</i> | 0.5       | 0.5      | 0.5      | 0.362(9)  | 0.020(2)                        |
| Ir                                                                                                      | 16 <i>c</i> | 0         | 0        | 0        | 0.748(3)  | 0.0164(4)                       |
| Ru                                                                                                      | 16 <i>c</i> | 0         | 0        | 0        | 0.252(3)  | 0.0164(4)                       |
| O                                                                                                       | 48 <i>f</i> | 0.3327(7) | 0.125    | 0.125    | 0.998(13) | 0.027(3)                        |
| O'                                                                                                      | 8 <i>b</i>  | 0.375     | 0.375    | 0.375    | 1.00(2)   | 0.012(7)                        |
| <b>50 % Ru Pyrochlore:</b> $a = 10.23414(9) \text{\AA}$ / Crystallite Size = $19.2 \pm 2.1 \text{ nm}$  |             |           |          |          |           |                                 |
| Ca                                                                                                      | 16 <i>d</i> | 0.5       | 0.5      | 0.5      | 0.669(3)  | 0.0888(9)                       |
| Na                                                                                                      | 16 <i>d</i> | 0.5       | 0.5      | 0.5      | 0.321(1)  | 0.0888(9)                       |
| Ir                                                                                                      | 16 <i>c</i> | 0         | 0        | 0        | 0.444(1)  | 0.0151(2)                       |
| Ru                                                                                                      | 16 <i>c</i> | 0         | 0        | 0        | 0.556(1)  | 0.0151(2)                       |
| O                                                                                                       | 48 <i>f</i> | 0.3266(3) | 0.125    | 0.125    | 1.000(5)  | 0.0053(8)                       |
| O'                                                                                                      | 8 <i>b</i>  | 0.375     | 0.375    | 0.375    | 1.001(11) | 0.018(3)                        |
| <b>75 % Ru Pyrochlore:</b> $a = 10.22500(7) \text{\AA}$ / Crystallite Size = $25.9 \pm 2.2 \text{ nm}$  |             |           |          |          |           |                                 |
| Ca                                                                                                      | 16 <i>d</i> | 0.5       | 0.5      | 0.5      | 0.619(2)  | 0.0150(7)                       |
| Na                                                                                                      | 16 <i>d</i> | 0.5       | 0.5      | 0.5      | 0.325(4)  | 0.0150(7)                       |
| Ir                                                                                                      | 16 <i>c</i> | 0         | 0        | 0        | 0.229(1)  | 0.0131(6)                       |
| Ru                                                                                                      | 16 <i>c</i> | 0         | 0        | 0        | 0.771(1)  | 0.0131(6)                       |
| O                                                                                                       | 48 <i>f</i> | 0.3239(3) | 0.125    | 0.125    | 1.000(5)  | 0.0017(9)                       |
| O'                                                                                                      | 8 <i>b</i>  | 0.375     | 0.375    | 0.375    | 1.001(11) | 0.025(3)                        |
| <b>100 % Ru Pyrochlore:</b> $a = 10.22067(9) \text{\AA}$ / Crystallite Size = $50.4 \pm 3.7 \text{ nm}$ |             |           |          |          |           |                                 |
| Ca                                                                                                      | 16 <i>d</i> | 0.5       | 0.5      | 0.5      | 0.651(4)  | 0.0443(6)                       |
| Na                                                                                                      | 16 <i>d</i> | 0.5       | 0.5      | 0.5      | 0.351(8)  | 0.0443(6)                       |
| Ru                                                                                                      | 16 <i>c</i> | 0         | 0        | 0        | 1.000(2)  | 0.0138(4)                       |
| O                                                                                                       | 48 <i>f</i> | 0.3372(5) | 0.125    | 0.125    | 1.000(9)  | 0.041(2)                        |
| O'                                                                                                      | 8 <i>b</i>  | 0.375     | 0.375    | 0.375    | 1.001(11) | 0.045(6)                        |

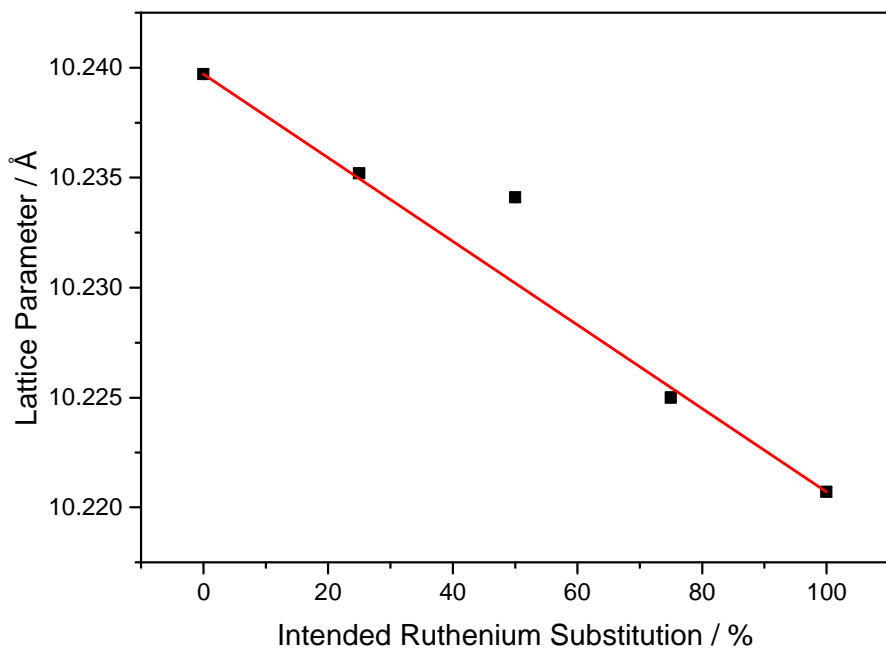

**Figure S2.3.2:** Refined lattice parameter as a function of intended ruthenium substitution.

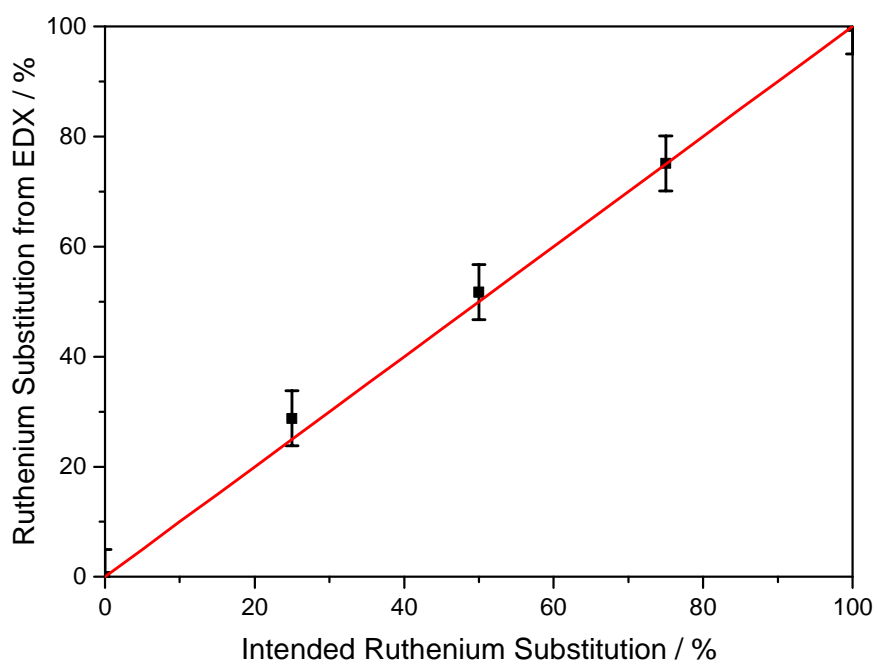

**Figure S2.3.3:** Measured ruthenium content from EDX as a function of nominal ruthenium substitution.

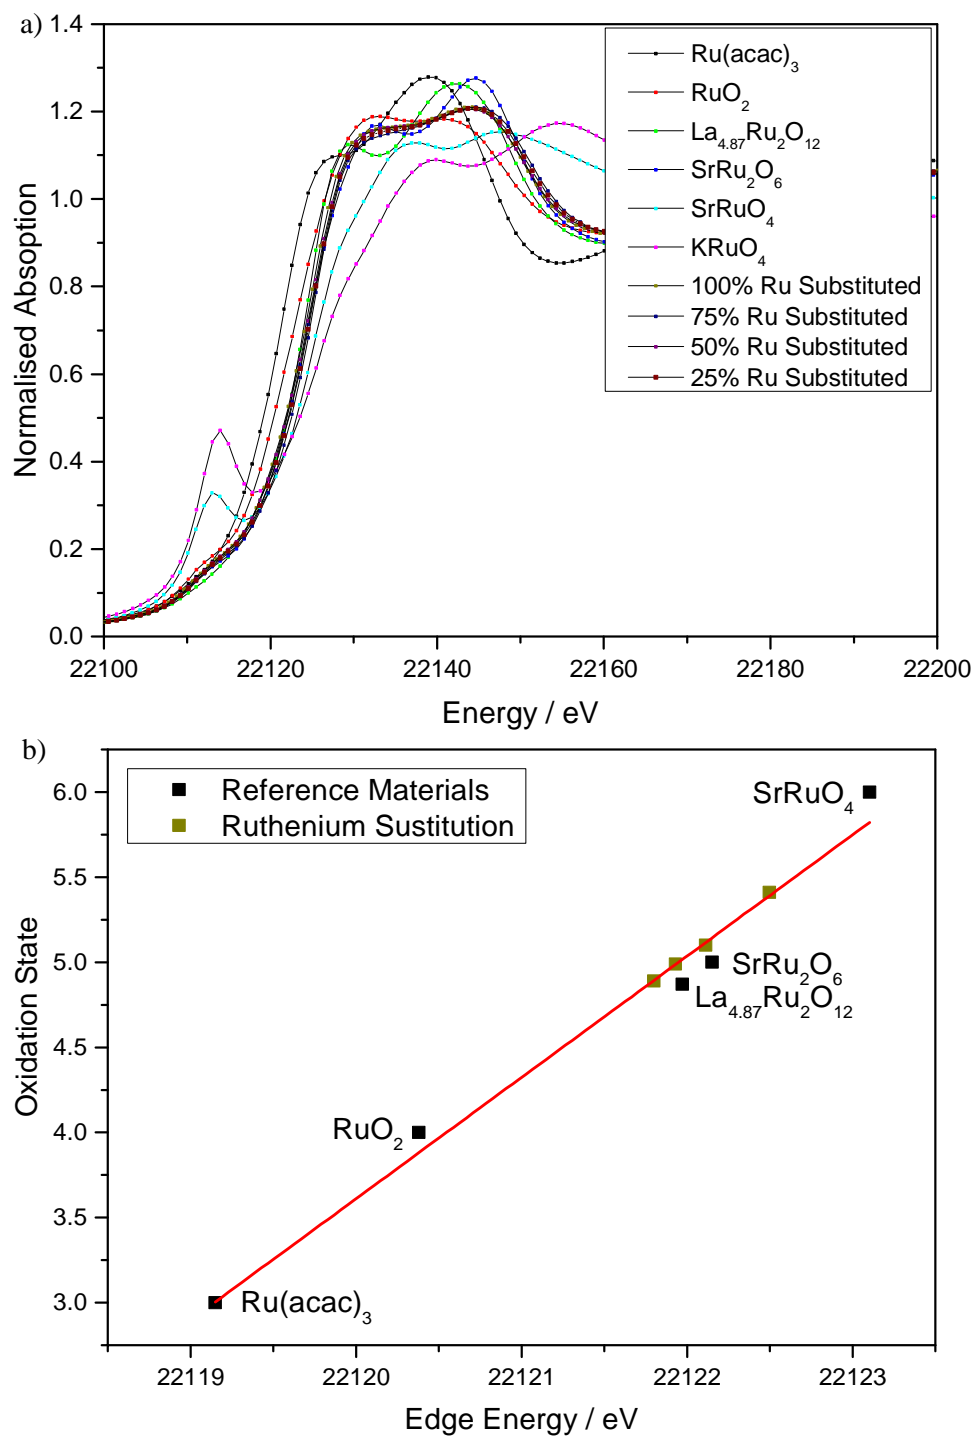

**Figure S2.3.4:** a) Ru K-edge XANES spectra of ruthenium substituted pyrochlore materials and reference materials for calibration. b) Edge Position against ruthenium oxidation state.

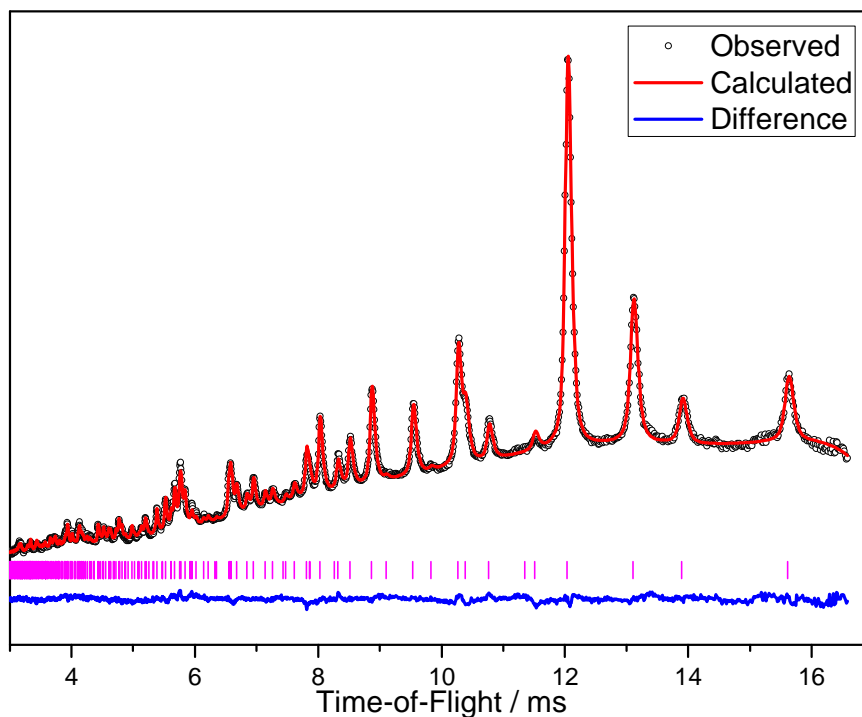

**Figure S2.3.5:** Rietveld refinement against time-of-flight neutron data from bank 5 of GEM for 50 % ruthenium substituted calcium sodium iridium oxide.

**Table S2.3.2:** Structural details of 50 % ruthenium substituted calcium sodium iridium oxide pyrochlore obtained from Rietveld refinement of powder neutron diffraction data.

| Atom                                                                            | Site | $x$         | $y$    | $z$    | Occ       | $U_{\text{iso}} / \text{\AA}^2$ |
|---------------------------------------------------------------------------------|------|-------------|--------|--------|-----------|---------------------------------|
| <b>50 % Ru Substituted Pyrochlore: <math>a = 10.23360(17) \text{\AA}</math></b> |      |             |        |        |           |                                 |
| Ca                                                                              | 16d  | 0.5         | 0.5    | 0.5    | 0.594(5)  | 0.0310(8)                       |
| Na                                                                              | 16d  | 0.5         | 0.5    | 0.5    | 0.320(9)  | 0.0310(8)                       |
| Ir                                                                              | 16c  | 0           | 0      | 0      | 0.496(6)  | 0.00726(5)                      |
| Ru                                                                              | 16c  | 0           | 0      | 0      | 0.504(6)  | 0.00726(5)                      |
| O                                                                               | 48f  | 0.32304(10) | 0.125  | 0.125  | 1.000(2)  | 0.1072(12)                      |
| O'                                                                              | 8b   | 0.375       | 0.375  | 0.375  | 0.990(6)  | 0.0280(9)                       |
| H                                                                               | 32e  | 0.3289      | 0.3289 | 0.3289 | 0.495(13) | *                               |

\*  $U_{11} = 0.7970(9)$ ,  $U_{22} = 0.3669(9)$ ,  $U_{33} = 0.7970(9)$ ,  $U_{12} = -0.2911(7)$ ,  $U_{13} = -0.3972(7)$ ,  $U_{23} = -0.2911(7)$

## S2.4: Rhodium Substitution

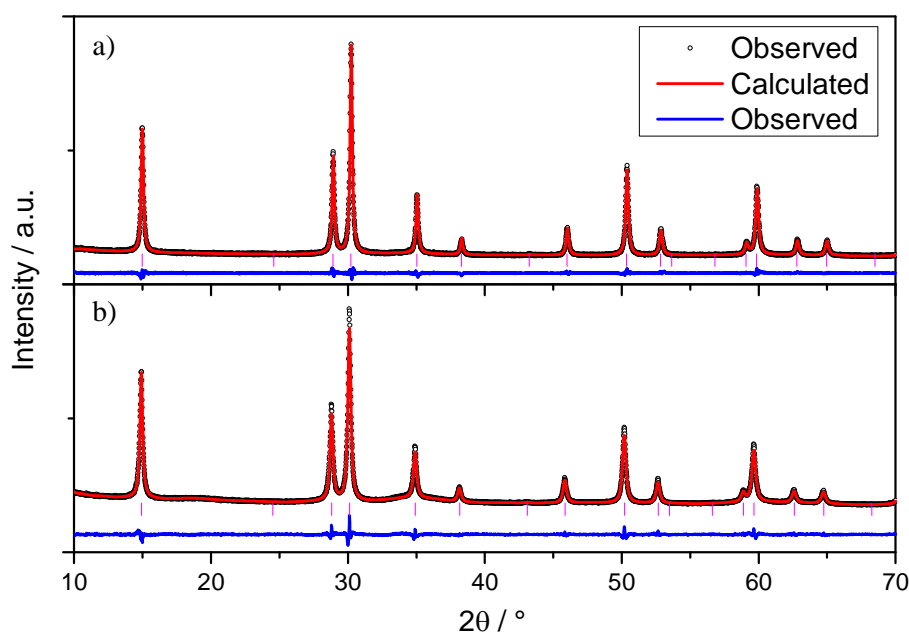

**Figure S2.4.1:** Rietveld refinements against powder XRD data ( $\lambda = 1.54056 \text{ \AA}$ ) for  $(\text{Ca,Na})_{2-x}(\text{Ir}_{1-y}\text{Rh}_y)_2\text{O}_6 \cdot \text{H}_2\text{O}$ , a)  $y = 0.15$  and b)  $y = 0.3$ .

**Table S2.4.1:** Structural details of pyrochlores obtained from Rietveld refinement of powder XRD data, of Rh substituted materials.

| Atom                                                                                                    | Site | $x$       | $y$   | $z$   | Occ      | $U_{\text{iso}} / \text{\AA}^2$ |
|---------------------------------------------------------------------------------------------------------|------|-----------|-------|-------|----------|---------------------------------|
| <b>15 % Rh Pyrochlore:</b> $a = 10.24467(5) \text{ \AA}$ / Crystallite Size = $32.4 \pm 3.5 \text{ nm}$ |      |           |       |       |          |                                 |
| Ca                                                                                                      | 16d  | 0.5       | 0.5   | 0.5   | 0.630(3) | 0.0327(9)                       |
| Na                                                                                                      | 16d  | 0.5       | 0.5   | 0.5   | 0.352(6) | 0.0327(9)                       |
| Ir                                                                                                      | 16c  | 0         | 0     | 0     | 0.830(2) | 0.0109(2)                       |
| Rh                                                                                                      | 16c  | 0         | 0     | 0     | 0.170(2) | 0.0109(2)                       |
| O                                                                                                       | 48f  | 0.3284(3) | 0.125 | 0.125 | 1.000(6) | 0.0119(14)                      |
| O'                                                                                                      | 8b   | 0.375     | 0.375 | 0.375 | 1.001(8) | 0.018(3)                        |
| <b>30 % Rh Pyrochlore:</b> $a = 10.27437(7) \text{ \AA}$ / Crystallite Size = $25.8 \pm 2.2 \text{ nm}$ |      |           |       |       |          |                                 |
| Ca                                                                                                      | 16d  | 0.5       | 0.5   | 0.5   | 0.594(3) | 0.0304(9)                       |
| Na                                                                                                      | 16d  | 0.5       | 0.5   | 0.5   | 0.269(5) | 0.0304(9)                       |
| Ir                                                                                                      | 16c  | 0         | 0     | 0     | 0.707(2) | 0.0165(2)                       |
| Rh                                                                                                      | 16c  | 0         | 0     | 0     | 0.293(2) | 0.0165(2)                       |
| O                                                                                                       | 48f  | 0.3280(3) | 0.125 | 0.125 | 1.000(6) | 0.0268(15)                      |
| O'                                                                                                      | 8b   | 0.375     | 0.375 | 0.375 | 1.000(8) | 0.038(4)                        |

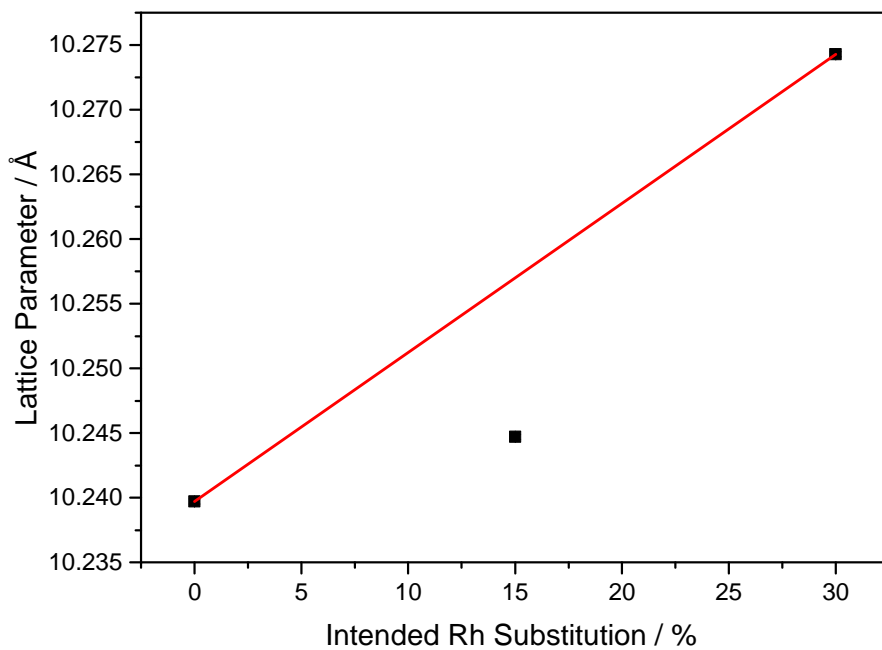

**Figure S2.4.2:** Refined Lattice Parameter as a function of intended rhodium substitution.

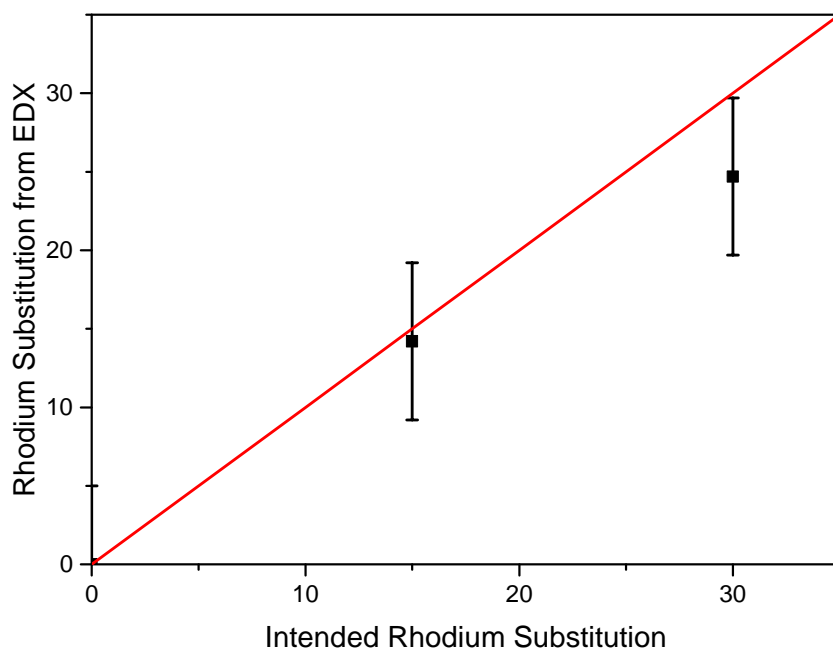

**Figure S2.4.3:** Measured rhodium content from EDX as a function of nominal rhodium substitution.



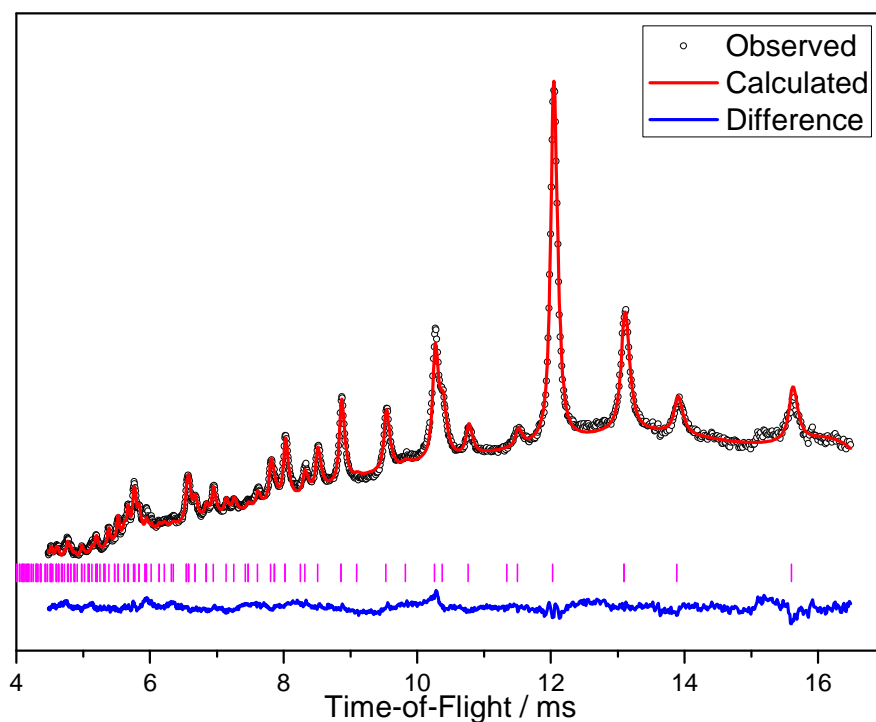

**Figure S2.4.4:** Rietveld refinements against time-of-flight neutron data from bank 5 of GEM for 30 % rhodium substituted calcium sodium iridium oxide.

**Table S2.4.2:** Structural details of 30 % rhodium substituted calcium sodium iridium oxide pyrochlore obtained from Rietveld refinement of powder neutron diffraction data.

| Atom                                                                          | Site | $x$       | $y$    | $z$    | Occ       | $U_{iso} / \text{\AA}^2$ |
|-------------------------------------------------------------------------------|------|-----------|--------|--------|-----------|--------------------------|
| <b>30 % Rh Substituted Pyrochlore: <math>a = 10.2263(2) \text{\AA}</math></b> |      |           |        |        |           |                          |
| Ca                                                                            | 16d  | 0.5       | 0.5    | 0.5    | 0.571(10) | 0.0267(12)               |
| Na                                                                            | 16d  | 0.5       | 0.5    | 0.5    | 0.303(13) | 0.0267(12)               |
| Ir                                                                            | 16c  | 0         | 0      | 0      | 0.729(7)  | 0.0096(2)                |
| Rh                                                                            | 16c  | 0         | 0      | 0      | 0.271(7)  | 0.0096(2)                |
| O                                                                             | 48f  | 0.3229(2) | 0.125  | 0.125  | 1.000(3)  | 0.0123(2)                |
| O'                                                                            | 8b   | 0.375     | 0.375  | 0.375  | 0.999(10) | 0.0238(12)               |
| H                                                                             | 32e  | 0.3289    | 0.3289 | 0.3289 | 0.50(2)   | *                        |

\*  $U_{11} = 0.659(14)$ ,  $U_{22} = 0.659(14)$ ,  $U_{33} = 0.659(14)$ ,  $U_{12} = -0.327(7)$ ,  $U_{13} = -0.327(7)$ ,  $U_{23} = -0.327(7)$

### S3: Samples prepared at lower temperature and lower pH

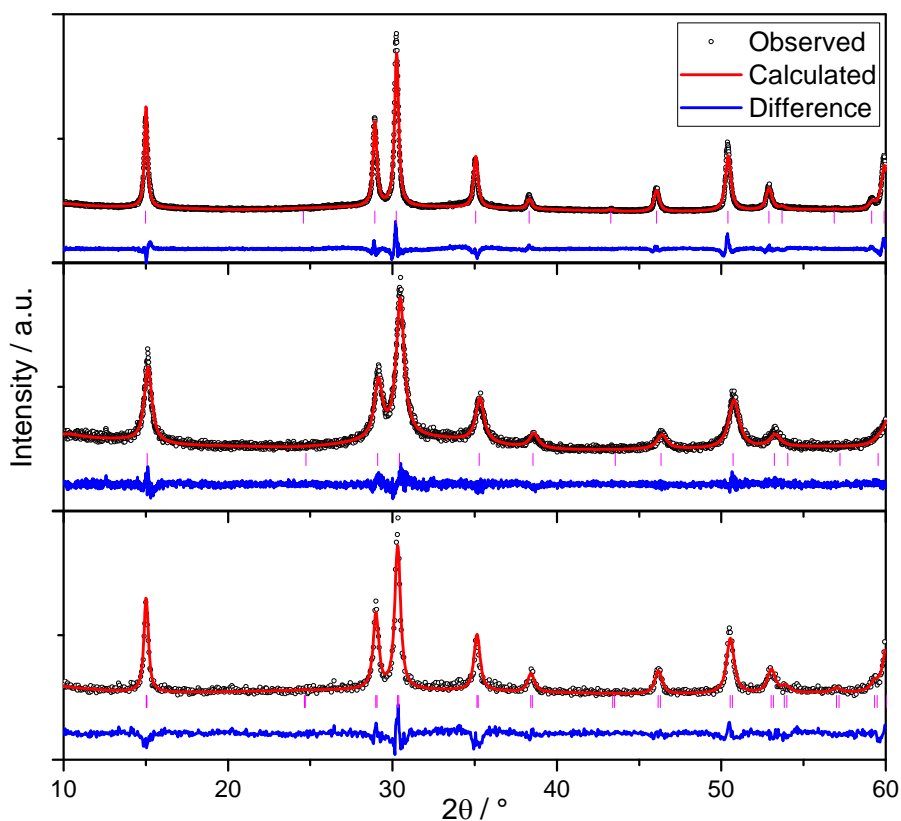

**Figure S3.1:** Le Bail fits to powder XRD data ( $\lambda = 1.54056 \text{ \AA}$ ) from  $(\text{Ca,Na})_{2-x}\text{Ir}_2\text{O}_6 \cdot n\text{H}_2\text{O}$  materials produced, a) in 5 M NaOH at 240 °C, b) in 10 M NaOH at 170 °C, and c) in 10 M NaOH at 200 °C.

**Table S3.1:** Effect of reaction conditions on lattice parameter and crystallite size of  $(\text{Ca,Na})_{2-x}\text{Ir}_2\text{O}_6 \cdot \text{H}_2\text{O}$ , determined from laboratory powder X-ray diffraction. For comparison the standard material prepared at 240 °C in 10 M is also shown here.

| Synthesis Temperature / °C | NaOH Concentration / M | Lattice Parameter / Å | Scherrer crystallite Size / nm |
|----------------------------|------------------------|-----------------------|--------------------------------|
| 170                        | 10                     | 10.1981(11)           | 11.2 ± 1.9                     |
| 200                        | 10                     | 10.2142(5)            | 25.0 ± 0.7                     |
| 240                        | 10                     | 10.23978(5)           | 36.2 ± 2.4                     |
| 240                        | 5                      | 10.2355(2)            | 20.8 ± 4.4                     |

## S4 TEM

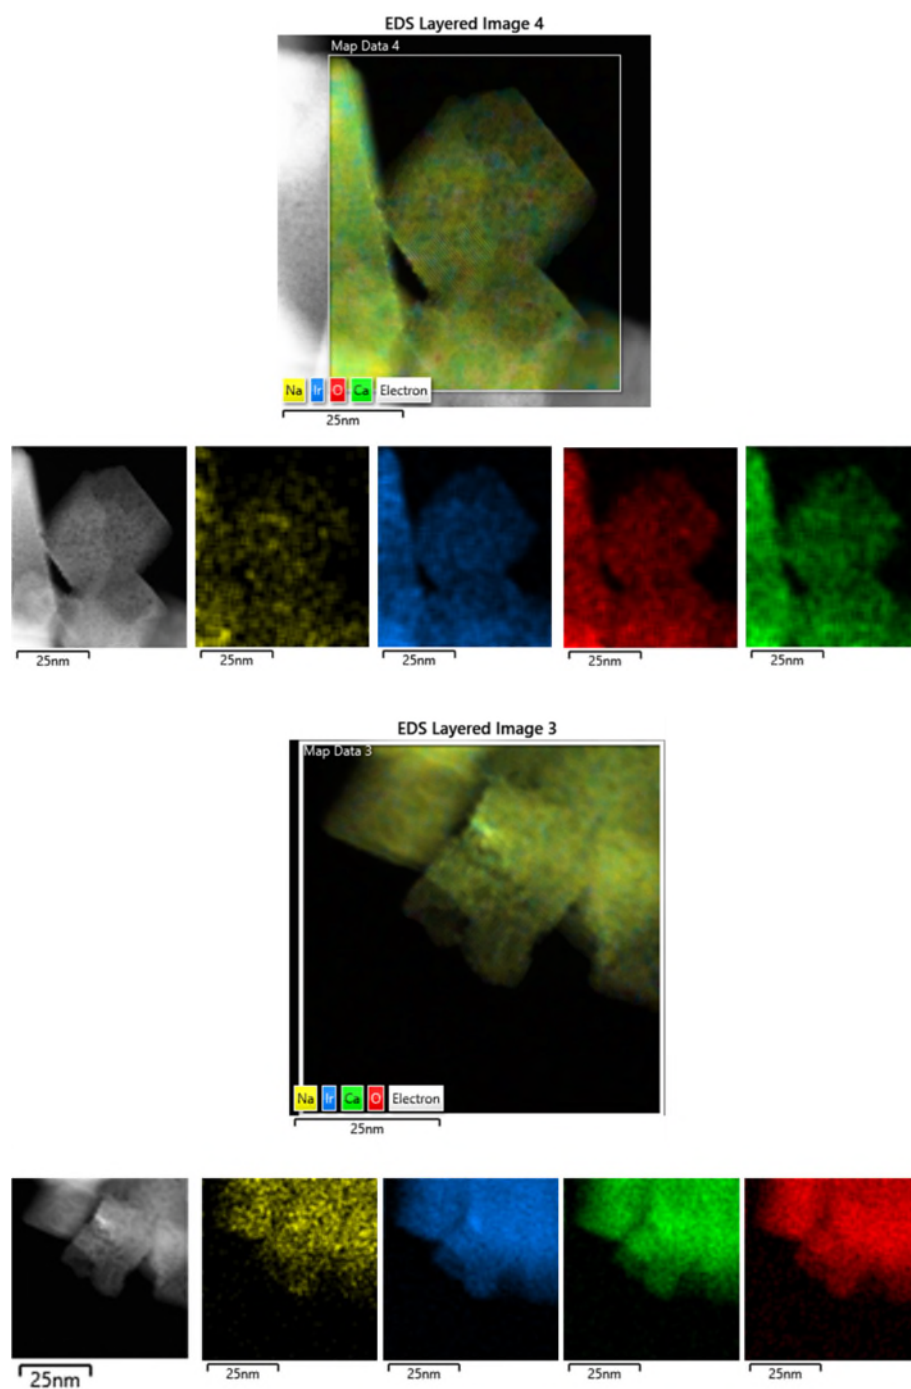

**Figure S4.1:** EDS maps of  $(\text{Na,Ca})_{2-x}\text{Ir}_2\text{O}_6 \cdot n\text{H}_2\text{O}$  showing two regions of the sample.

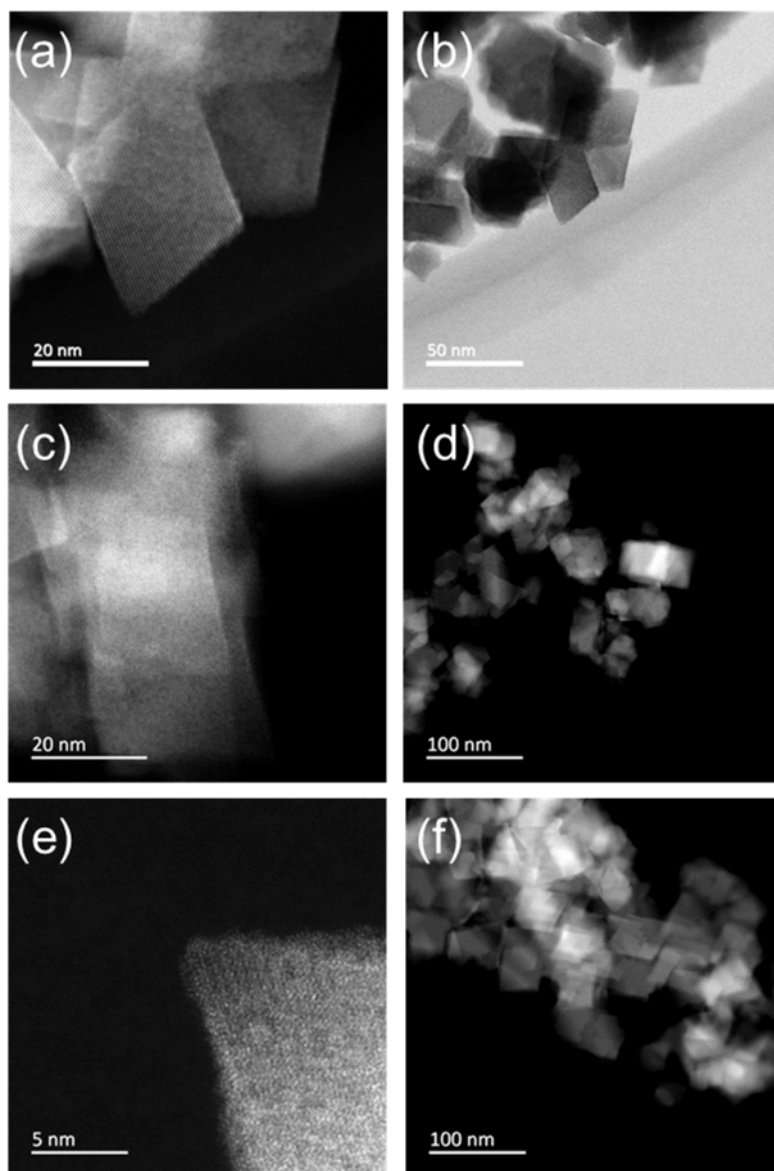

**Figure S4.2:** TEM images of  $(\text{Na,Ca})_{2-x}\text{Ir}_2\text{O}_6 \cdot n\text{H}_2\text{O}$  (a) and (b) as-made, (c) and (d) after 80 °C acid treatment and (e) and (f) after 100 °C acid treatment.

## S5 Acid leached samples

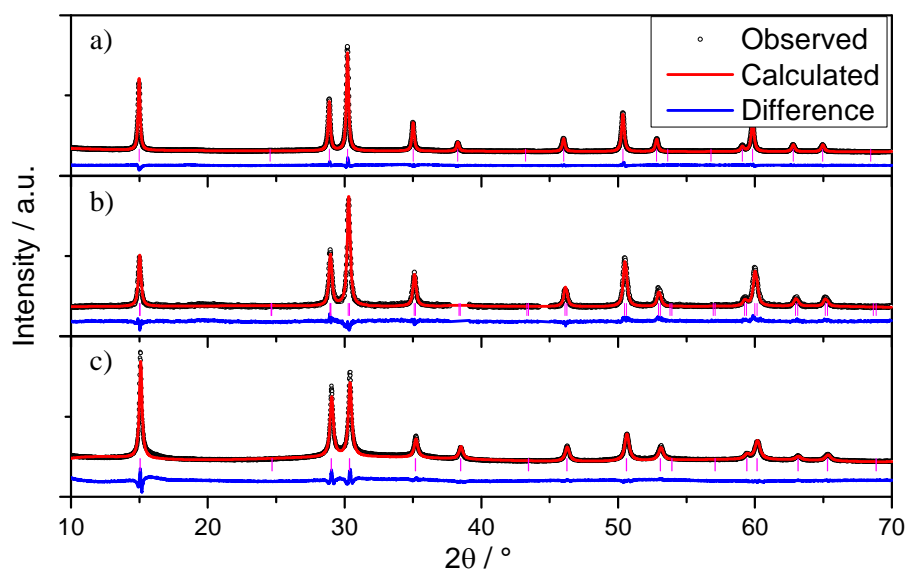

**Figure S5.1:** Rietveld refinements against powder XRD data ( $\lambda = 1.54056 \text{ \AA}$ ) for  $\text{Ca}_{2-x}\text{Ir}_2\text{O}_6 \cdot \text{H}_2\text{O}$ , a) as made,  $a = 10.24030(3) \text{ \AA}$ , b) leached at  $80^\circ\text{C}$ ,  $a = 10.2194(2) \text{ \AA}$ , c) leached at  $110^\circ\text{C}$ ,  $a = 10.19599(12) \text{ \AA}$ .

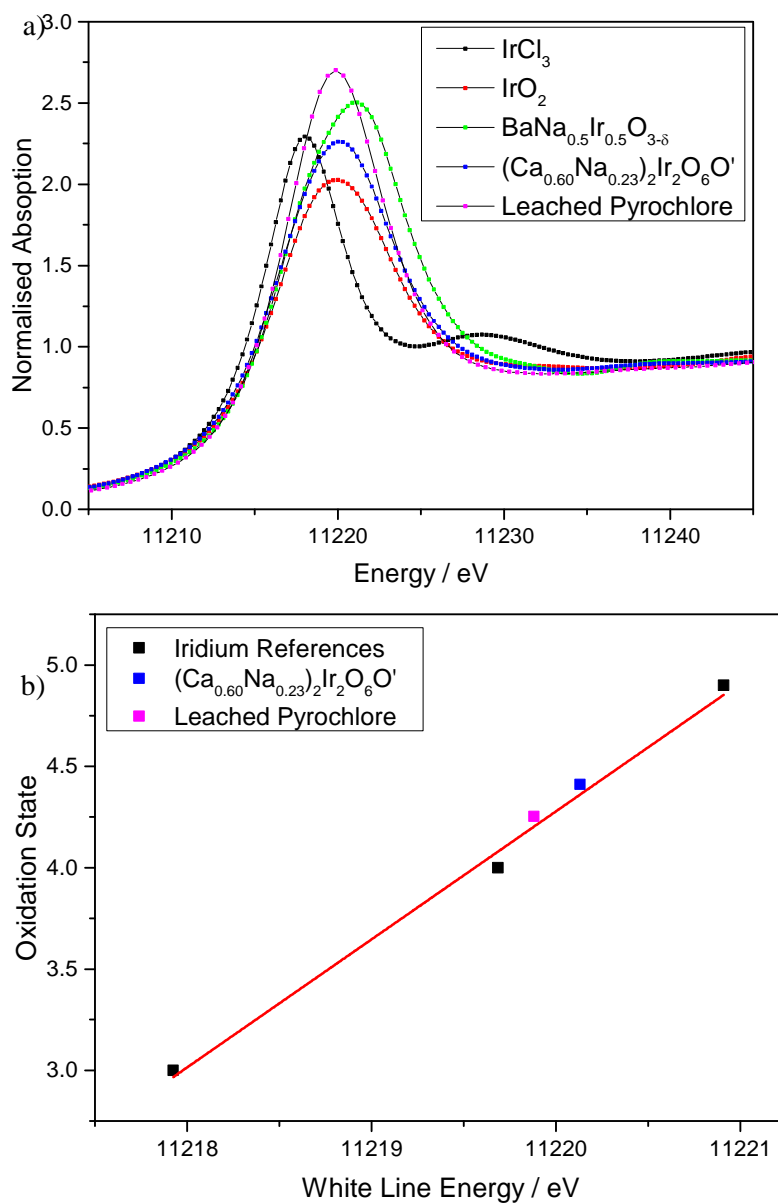

**Figure S5.2:** a) Ir L<sub>III</sub>-edge XANES spectra of calcium sodium iridium oxide acid leached at 110 °C and reference materials for calibration. b) White line position against iridium oxidation state.

**Table S5.1:** Surface areas and oxygen evolution onset voltages at the beginning and end of life for calcium iridium oxide and calcium sodium iridium oxide pyrochlore materials under various degrees of acid leaching.

| Material /<br>Leaching Temperature                                | BET                                              | OER Onset Voltage / V |                |
|-------------------------------------------------------------------|--------------------------------------------------|-----------------------|----------------|
|                                                                   | Surface<br>Area / m <sup>2</sup> g <sup>-1</sup> | Beginning<br>of Life  | End of<br>Life |
| (Ca,Na) <sub>2-x</sub> Ir <sub>2</sub> O <sub>6</sub> O' / 80 °C  | 39.7                                             | 1.433                 | 1.429          |
| (Ca,Na) <sub>2-x</sub> Ir <sub>2</sub> O <sub>6</sub> O' / 110 °C | 22.6                                             | 1.407                 | 1.409          |
| Ca <sub>2-x</sub> Ir <sub>2</sub> O <sub>6</sub> O'               | 27.3                                             | 1.421                 | 1.422          |
| Ca <sub>2-x</sub> Ir <sub>2</sub> O <sub>6</sub> O' / 80 °C       | 30.6                                             | 1.422                 | 1.422          |
| Ca <sub>2-x</sub> Ir <sub>2</sub> O <sub>6</sub> O' / 110 °C      | 28.9                                             | 1.407                 | 1.412          |

## S6 INS studies

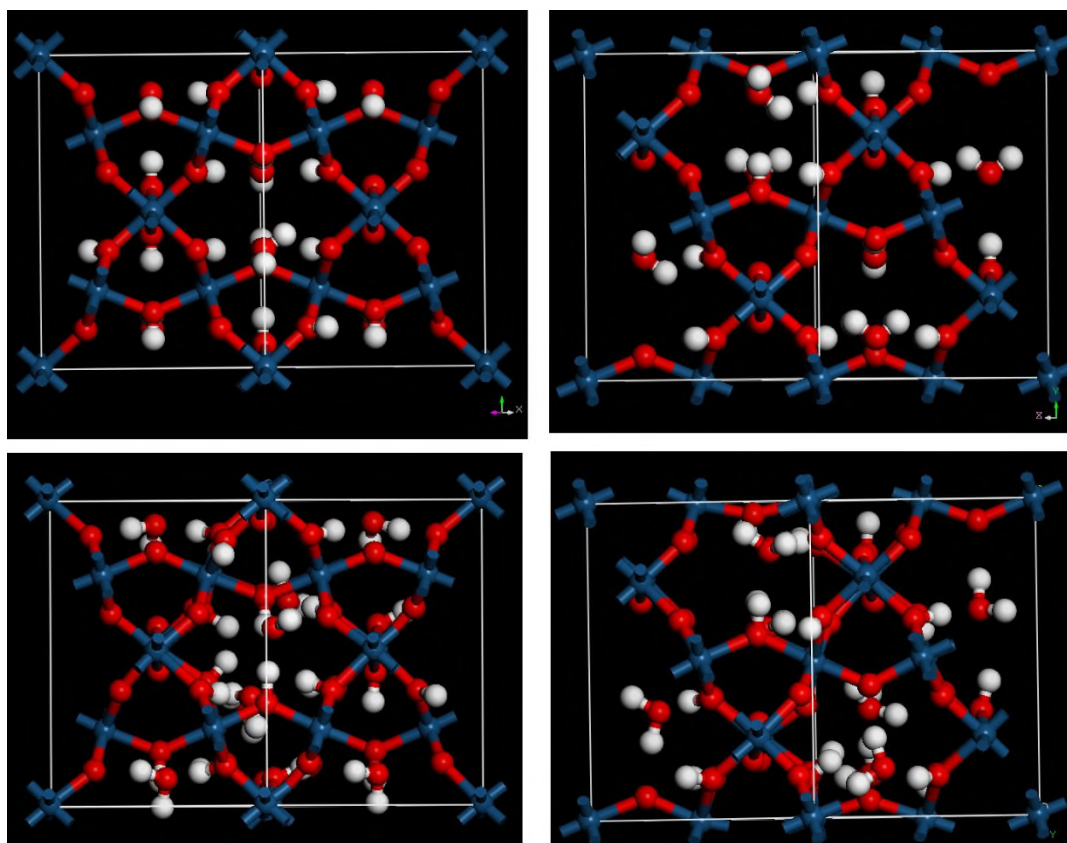

**Figure S6.1:** Structures of  $\text{Ir}_2\text{O}_4(\text{OH})_2 \cdot \text{H}_2\text{O}$  used for the computational studies. Left side: the ordered model, right side: the disordered model. Top row: initial structures, bottom row: after geometry optimisation.

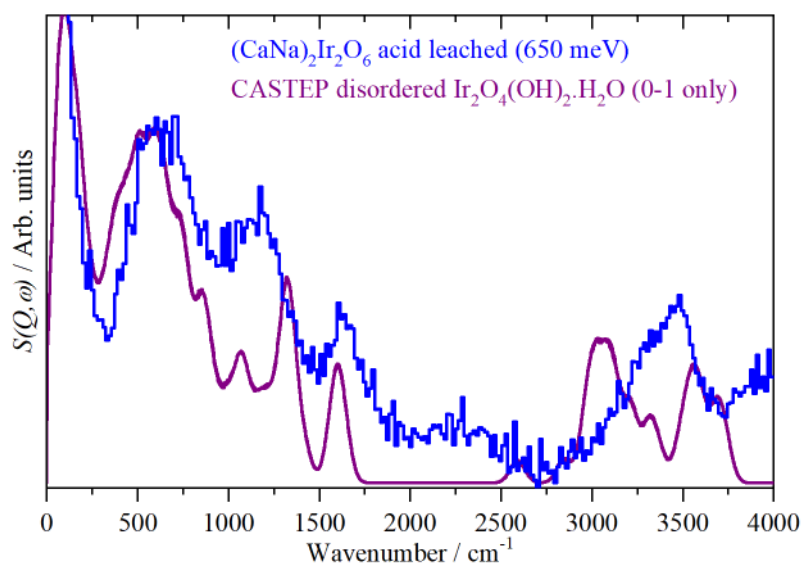

**Figure S6.2:** Comparison of the INS spectra of acid leached  $(\text{Na,Ca})_{2-x}\text{Ir}_2\text{O}_6 \cdot n\text{H}_2\text{O}$  and that generated from the geometry optimised disordered structure of  $\text{Ir}_2\text{O}_4(\text{OH})_2 \cdot \text{H}_2\text{O}$  (bottom right in Figure S6.1).

**Table S6.1:** Observed and calculated transition energies ( $\text{cm}^{-1}$ ) for the acid leached iridate,  $(\text{Na,Ca})_{2-x}\text{Ir}_2\text{O}_6 \cdot n\text{H}_2\text{O}$ .

| Experimental | Ordered structure | Disordered structure | Assignment                               |
|--------------|-------------------|----------------------|------------------------------------------|
|              |                   | 3700                 | Weakly H-bonded water O–H stretch        |
|              |                   | 3560                 |                                          |
| 3470s,br     | 3560              |                      | Hydroxyl O–H stretch                     |
|              | 3310              |                      | Water O–H stretch                        |
|              | 2980              | 3060                 | Strongly H-bonded hydroxyl O–H stretch   |
|              | 2300              | 2600                 | Strongly H-bonded hydroxyl O–H stretch   |
| 1640m        | 1620              | 1610                 | Water H–O–H bend                         |
|              | 1340              | 1320                 | Strongly H-bonded hydroxyl in-plane bend |
| 1160s        | 1070              | 1070                 | Hydroxyl in-plane bend                   |
|              | 780               |                      | Hydroxyl out-of-plane bend               |
| 600s,br      | 580               | 550                  | Water librations                         |

**S7: Further electrochemical / mass spectrometry data from devices**

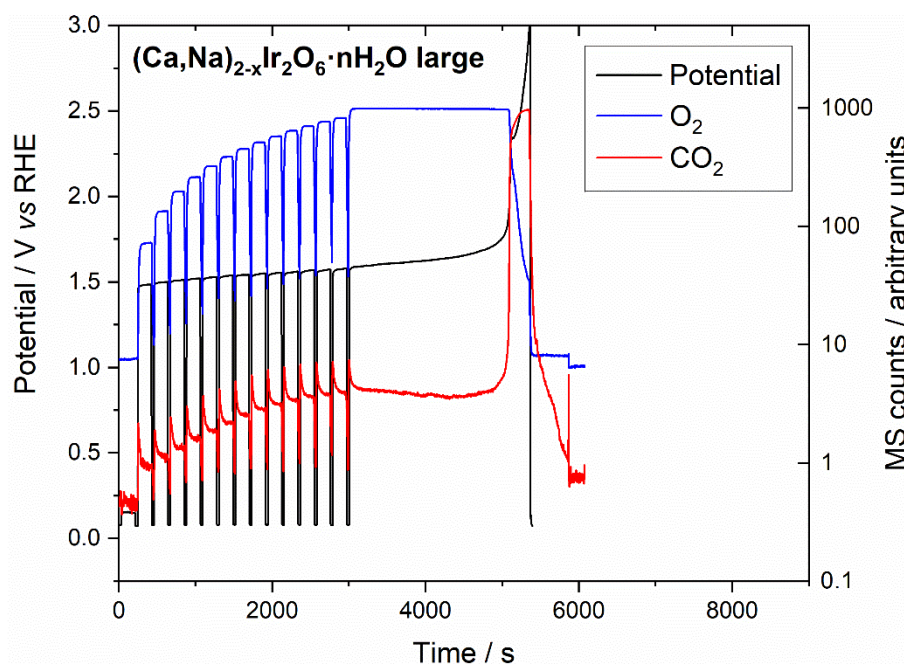



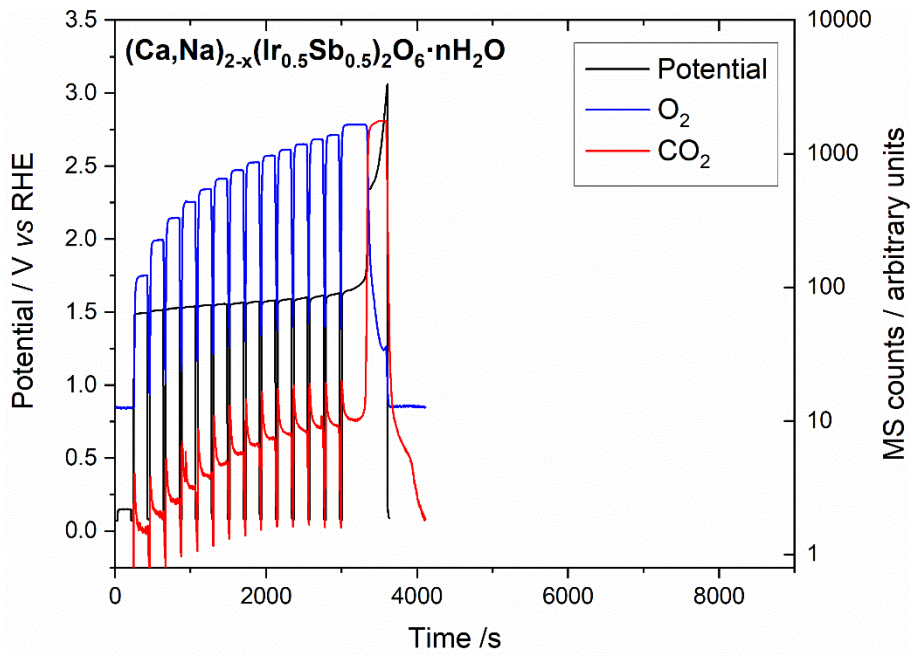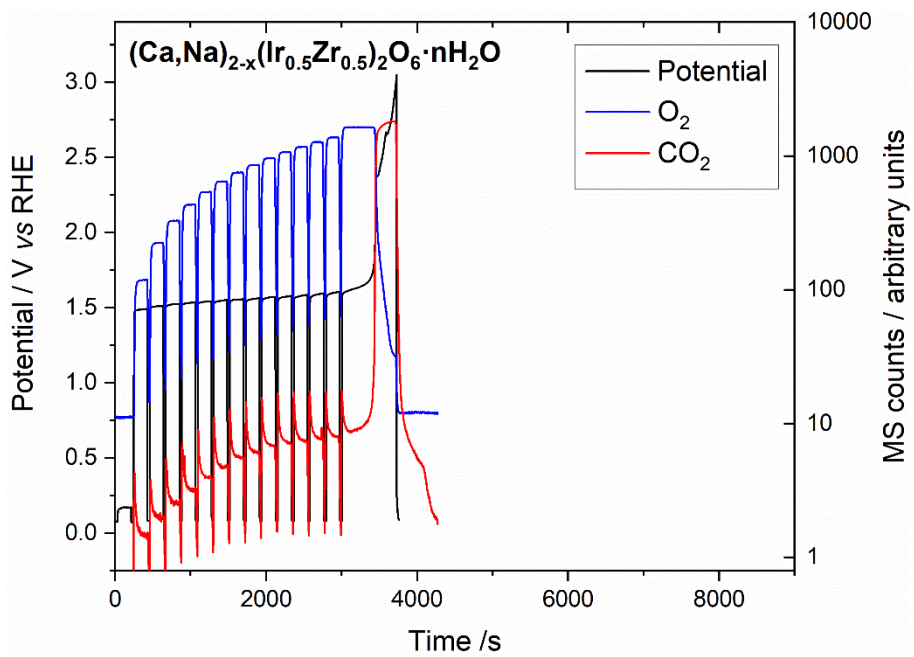

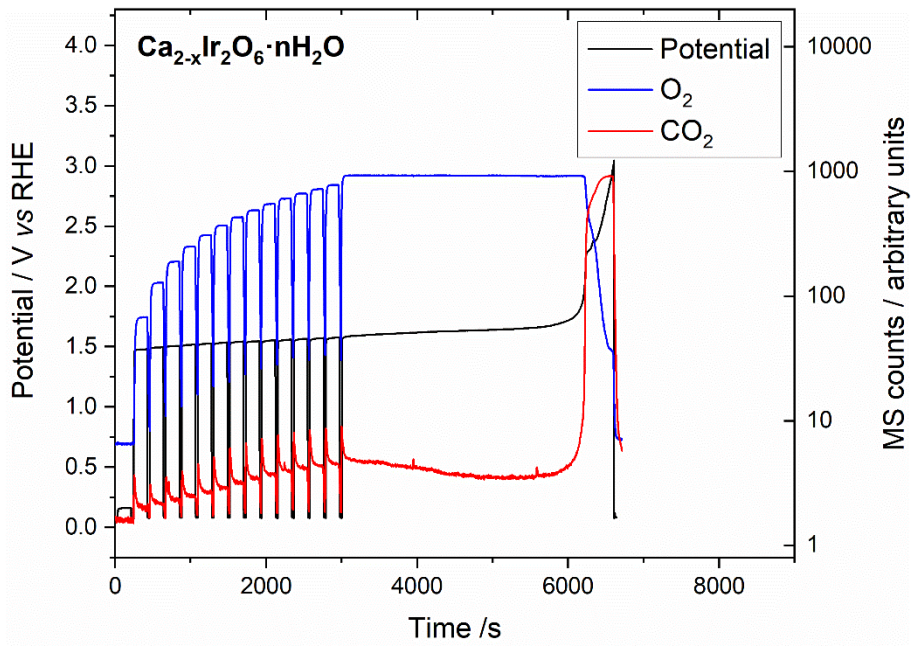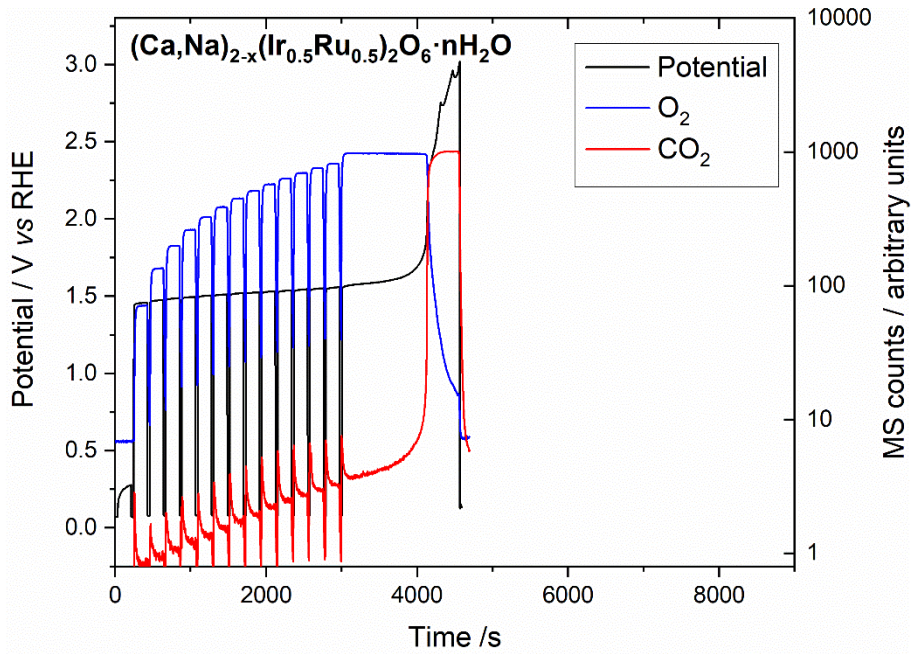

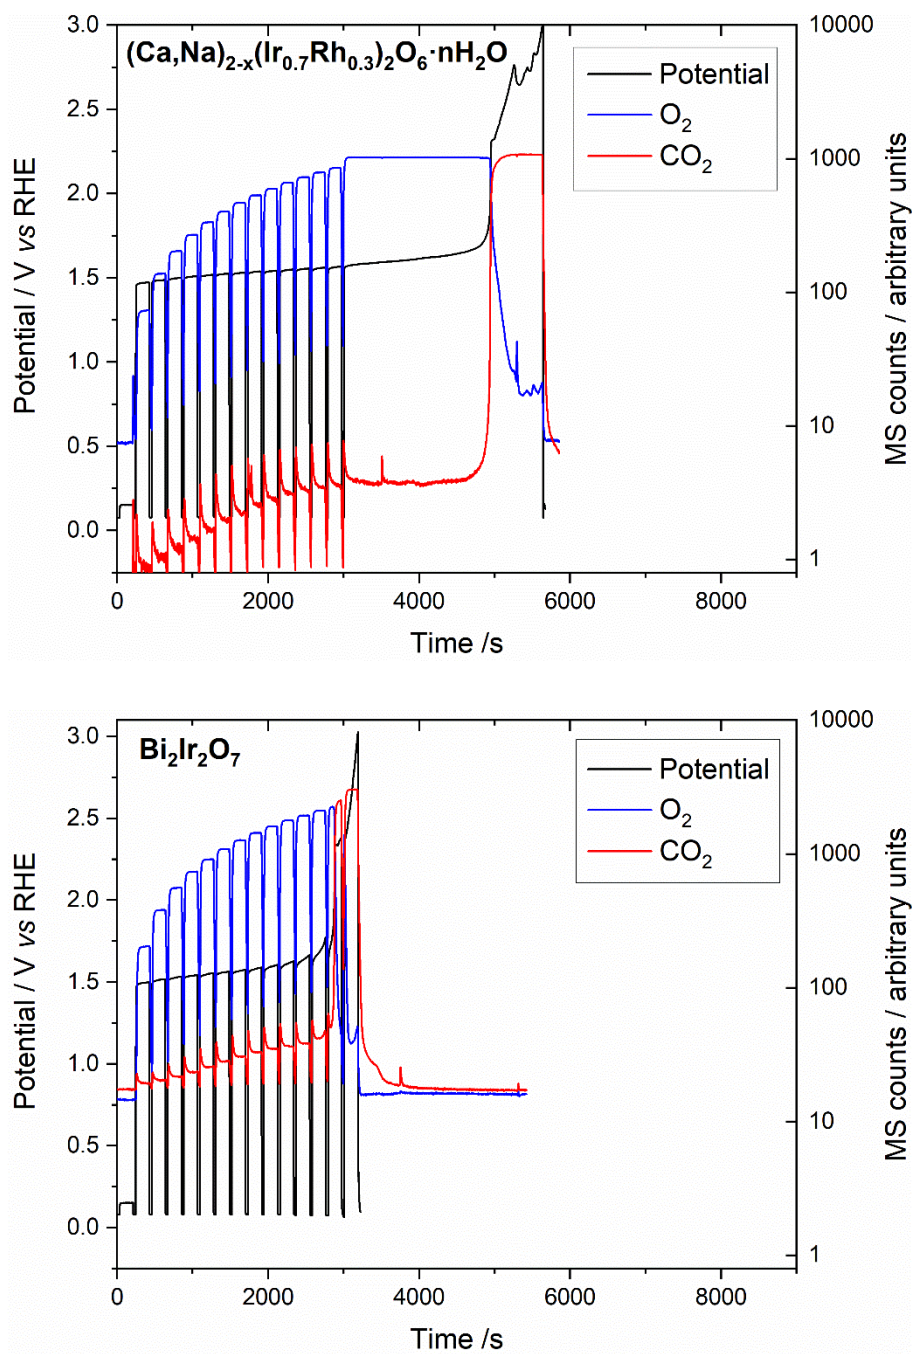

**Figure S7.1: Mass spectrometry results as a function of measured potential in devices fabricated from all samples studied (see Figure 3b for data from the small particle size  $(\text{Ca,Na})_{2-x}\text{Ir}_2\text{O}_6 \cdot n\text{H}_2\text{O}$ )**

The  $\text{O}_2:\text{CO}_2$  ratio provides a direct comparison of the two main competing reactions R1 and R2.

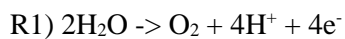

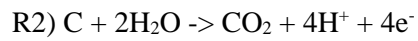

The overall Faradaic Efficiency for  $\text{O}_2 = \epsilon_{\text{O}_2} / (\epsilon_{\text{CO}_2} + \epsilon_{\text{O}_2})$  where:

$\epsilon_{\text{O}_2}$  is the calculated Faradaic current for the  $\text{O}_2$  evolution reaction

$\epsilon_{\text{CO}_2}$  is the calculated Faradaic current for the  $\text{CO}_2$  evolution reaction

For equivalent mass detection efficiency and the number of electrons yield per gas molecule, an example  $\text{O}_2/\text{CO}_2$  ratio 100 would yield  $100/101 = 99\%$  overall Faradaic Efficiency for  $\text{O}_2$  evolution.
